# Supplementary material for: Effects of Different Types of Pathogenic Variants on Phenotypes of Familial Hypercholesterolemia
Source: PubMed Central journal article supplement (PMC9035489; doi:10.3389/fgene.2022.872056), 2022-04-11
Supplement: Presentation1.pdf [file Presentation1.pdf]

## *Supplementary Material*

**Supplemental Figure 1. STROBE flow diagram of patient selection**

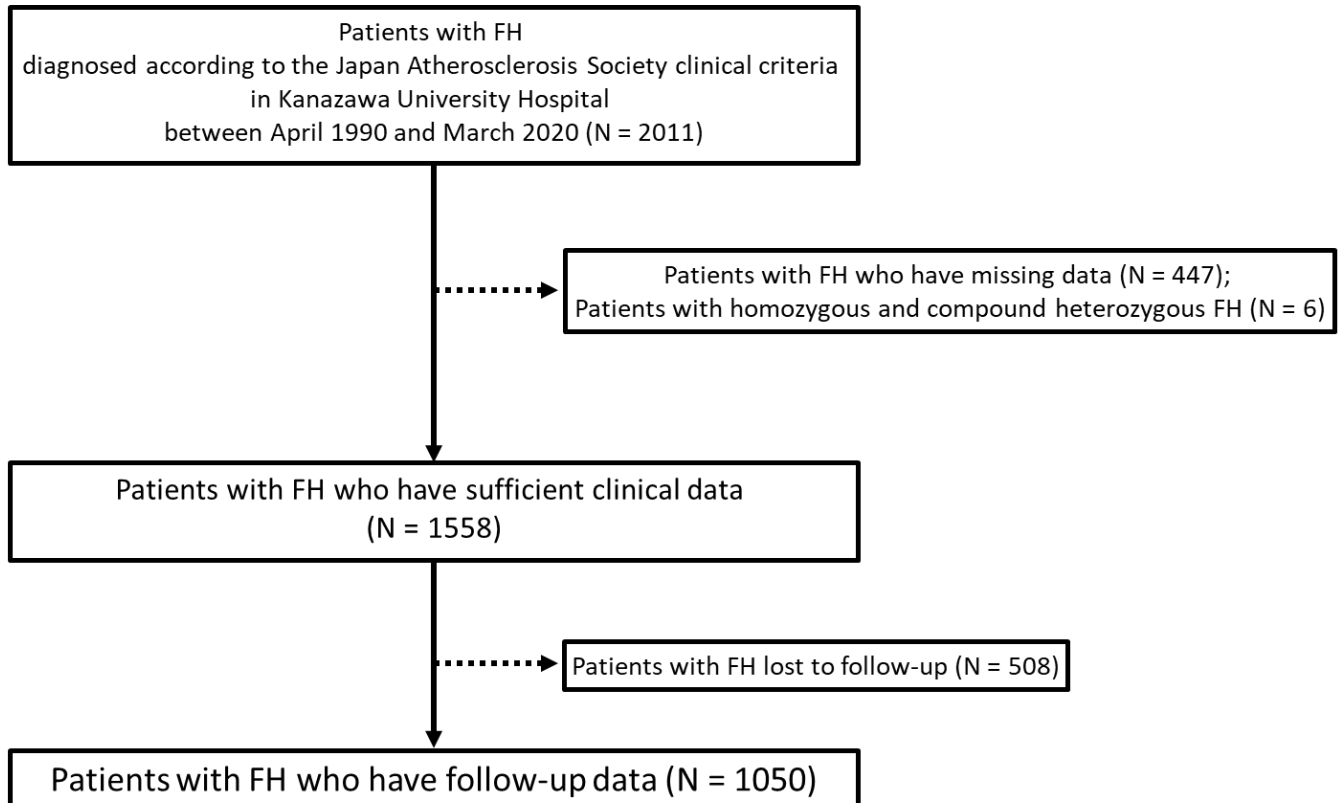

The flow diagram shows the process of patient selection.

**Supplemental Table 1. Baseline characteristics according to genotype**

|                                               | All<br>(N = 1050) | without pathogenic variants<br>(N = 385) | with missense variants<br>(N = 277) | with PTVs<br>(N = 388) |
|-----------------------------------------------|-------------------|------------------------------------------|-------------------------------------|------------------------|
| Age (years)                                   | 49 ± 16           | 52 ± 16                                  | 48 ± 17                             | 46 ± 17                |
| Male gender (%)                               | 490 (46.7%)       | 200 (51.9%)                              | 127 (45.8%)                         | 163 (42.0%)            |
| Hypertension (%)                              | 250 (23.8%)       | 99 (25.7%)                               | 66 (23.8%)                          | 85 (21.9%)             |
| Diabetes (%)                                  | 83 (7.9%)         | 53 (13.8%)                               | 14 (5.1%)                           | 16 (4.1%)              |
| Smoking (%)                                   | 224 (21.3%)       | 90 (23.4%)                               | 56 (20.2%)                          | 78 (20.1%)             |
| Total cholesterol level (mg/dL)               | 326 [268–365]     | 318 [244–344]                            | 328 [279–377]                       | 348 [290–392]          |
| Triglyceride level (mg/dL)                    | 113 [76–177]      | 142 [90–190]                             | 125 [80–175]                        | 104 [78–170]           |
| HDL cholesterol level (mg/dL)                 | 47 [43–51]        | 49 [44–52]                               | 48 [43–50]                          | 45 [41–49]             |
| LDL cholesterol level (at baseline, mg/dL)    | 244 [208–279]     | 216 [196–248]                            | 236 [219–285]                       | 256 [218–295]          |
| LDL cholesterol level (at follow-up, mg/dL)   | 110 [96–120]      | 112 [98–1120]                            | 114 [94–122]                        | 106 [90–118]           |
| Family history of FH and/or premature CVD (%) | 776 (73.9%)       | 277 (71.9%)                              | 193 (69.7%)                         | 306 (78.9%)            |
| History of CVD (%)                            | 290 (27.6%)       | 97 (25.2%)                               | 69 (24.9%)                          | 124 (32.0%)            |

PTV: protein-truncating variant, CVD: cardiovascular disease, HDL: high-density lipoprotein, LDL: low-density lipoprotein, FH: familial hypercholesterolemia

**Supplemental Table 2. Mutations identified in FH genes**

| Gene        | Nucleotide change | Mutation type | Effect on protein  | Number of patients | ACMG                                     |
|-------------|-------------------|---------------|--------------------|--------------------|------------------------------------------|
| <i>LDLR</i> | c.14G>A           | Missense      | p.Gly5Asp          | 4                  | PM1/PM2/PP3/PP4<br>Likely pathogenic     |
| <i>LDLR</i> | c.68-1G>C         | Splice site   | NA                 | 2                  | PVS1/PM2/PM4/PP1/PP5<br>Pathogenic       |
| <i>LDLR</i> | c.130T>G          | Missense      | p.Trp44Gly         | 3                  | PM1/PM2/PP3/PP4<br>Likely pathogenic     |
| <i>LDLR</i> | c.137G>A          | Missense      | p.Cys46Tyr         | 4                  | PM1/PM2/PP3/PP5<br>Likely pathogenic     |
| <i>LDLR</i> | c.191-2A>G        | Splice site   | NA                 | 6                  | PVS1/PM2/PM4/PP1<br>Pathogenic           |
| <i>LDLR</i> | c.283T>G          | Missense      | p.Cys95Gly         | 4                  | PM1/PM2/PP3/PP4<br>Likely pathogenic     |
| <i>LDLR</i> | c.284G>T          | Missense      | p.Cys95Phe         | 3                  | PM2/PM5/PP1/PP5<br>Likely pathogenic     |
| <i>LDLR</i> | c.313+1G>A        | Splice site   | NA                 | 2                  | PVS1/PM2/PM4<br>Pathogenic               |
| <i>LDLR</i> | c.344G>A          | Missense      | p.Arg115His        | 3                  | PS1/PM2/PP3<br>Likely pathogenic         |
| <i>LDLR</i> | c.361T>G          | Missense      | p.Cys121Gly        | 5                  | PM1/PM2/PP3/PP4/PP5<br>Likely pathogenic |
| <i>LDLR</i> | c.378del          | Frameshift    | p.Phe126LeufsTer80 | 4                  | PVS1/PM2/PM4/PP1<br>Pathogenic           |
| <i>LDLR</i> | c.389dupC         | Frameshift    | p.Asp131ArgfsTer49 | 5                  | PVS1/PM1/PM2/PM4/PP5<br>Pathogenic       |

## Supplementary Material

|             |              |             |                    |   |                                          |
|-------------|--------------|-------------|--------------------|---|------------------------------------------|
| <i>LDLR</i> | c.413C>G     | Nonsense    | p.Ser138Ter        | 6 | PVS1/PM2/PM4/PP1/PP5<br>Pathogenic       |
| <i>LDLR</i> | c.418G>A     | Missense    | p.Glu140Lys        | 4 | PM1/PM2/PP3/PP5<br>Likely pathogenic     |
| <i>LDLR</i> | c.478T>C     | Missense    | p.Cys160Arg        | 4 | PM1/PM2/PP3/PP5<br>Likely pathogenic     |
| <i>LDLR</i> | c.489G>T     | Missense    | p.Gln163His        | 4 | PM1/PM2/PP3/PP5<br>Likely pathogenic     |
| <i>LDLR</i> | c.530C>T     | Missense    | p.Ser177Leu        | 4 | PM1/PM2/PP3/PP5<br>Likely pathogenic     |
| <i>LDLR</i> | c.532G>T     | Missense    | p.Asp178Tyr        | 5 | PM1/PM2/PP3/PP5<br>Likely pathogenic     |
| <i>LDLR</i> | c.611G>C     | Missense    | p.Cys204Ser        | 6 | PM1/PM2/PP3/PP5<br>Likely pathogenic     |
| <i>LDLR</i> | c.642G>C     | Missense    | p.Trp214Cys        | 7 | PM1/PM2/PP3/PP5<br>Likely pathogenic     |
| <i>LDLR</i> | c.682G>A     | Missense    | p.Glu228Gln        | 5 | PM1/PM2/PP3/PP5<br>Likely pathogenic     |
| <i>LDLR</i> | c.686_689del | Frameshift  | p.Glu229AlafsTer35 | 4 | PVS1/PM2/PM4/PP1<br>Pathogenic           |
| <i>LDLR</i> | c.694+1G>A   | Splice site | NA                 | 2 | PVS1/PM2/PM4/PP1<br>Pathogenic           |
| <i>LDLR</i> | c.718G>A     | Missense    | p.Glu240Lys        | 3 | PM1/PM2/PP3/PP5<br>Likely pathogenic     |
| <i>LDLR</i> | c.718G>T     | Nonsense    | p.Glu240Ter        | 2 | PM1/PM2/PP3/PP4<br>Likely pathogenic     |
| <i>LDLR</i> | c.726G>C     | Missense    | p.Gln242His        | 4 | PM1/PM2/PP3/PP4<br>Likely pathogenic     |
| <i>LDLR</i> | c.796G>A     | Missense    | p.Asp266Asn        | 4 | PM1/PM2/PP3/PP4<br>Likely pathogenic     |
| <i>LDLR</i> | c.797A>G     | Missense    | p.Asp266Gly        | 3 | PM1/PM2/PM5/PP1/PP3<br>Likely pathogenic |
| <i>LDLR</i> | c.829G>T     | Nonsense    | p.Glu277Ter        | 2 | PVS1/PM2/PM4/PP1<br>Pathogenic           |

|             |                    |             |                    |   |                                      |
|-------------|--------------------|-------------|--------------------|---|--------------------------------------|
| <i>LDLR</i> | c.874delC          | Frameshift  | p.Leu292TrpfsTer78 | 3 | PVS1/PM2/PM4/PP1<br>Pathogenic       |
| <i>LDLR</i> | c.901G>T           | Missense    | p.Asp301Tyr        | 5 | PM1/PM2/PP3/PP5<br>Likely pathogenic |
| <i>LDLR</i> | c.902A>T           | Missense    | p.Asp301Val        | 4 | PM1/PM2/PP3/PP5<br>Likely pathogenic |
| <i>LDLR</i> | c.937T>G           | Missense    | p.Cys313Gly        | 3 | PM1/PM2/PP3/PP4<br>Likely pathogenic |
| <i>LDLR</i> | c.939C>A           | Missense    | p.Cys313Ter        | 2 | PVS1/PM2/PM4/PP5<br>Pathogenic       |
| <i>LDLR</i> | c.940+2T>C         | Splice site | NA                 | 2 | PVS1/PM2/PM4/PP1<br>Pathogenic       |
| <i>LDLR</i> | c.967G>A           | Missense    | p.Gly323Ser        | 4 | PM1/PM2/PP3/PP4<br>Likely pathogenic |
| <i>LDLR</i> | c.1007_1010delACGA | Frameshift  | p.Tyr336CysfsTer33 | 2 | PVS1/PM2/PM4/PP5<br>Pathogenic       |
| <i>LDLR</i> | c.1012T>A          | Missense    | p.Cys338Ser        | 2 | PM1/PM2/PP3/PP5<br>Likely pathogenic |
| <i>LDLR</i> | c.1056C>A          | Nonsense    | p.Cys352Ter        | 4 | PVS1/PM2/PM4/PP5<br>Pathogenic       |
| <i>LDLR</i> | c.1062dupT         | Frameshift  | p.Ile355TyrfsTer3  | 5 | PVS1/PM2/PM4/PP5<br>Pathogenic       |
| <i>LDLR</i> | c.1067A>T          | Missense    | p.Asp356Val        | 4 | PM1/PM2/PP3/PP4<br>Likely pathogenic |
| <i>LDLR</i> | c.1069G>T          | Nonsense    | p.Glu357Ter        | 2 | PVS1/PM2/PM4<br>Pathogenic           |
| <i>LDLR</i> | c.1114_1115insC    | Frameshift  | p.Glu372AlafsTer9  | 4 | PVS1/PM2/PM4/PP5<br>Pathogenic       |
| <i>LDLR</i> | c.1123_1124insGA   | Nonsense    | p.Tyr375Ter        | 2 | PVS1/PM2/PM4/PP5<br>Pathogenic       |
| <i>LDLR</i> | c.1183_1184insC    | Frameshift  | p.Val395AlafsTer46 | 2 | PVS1/PM2/PM4/PP5<br>Pathogenic       |
| <i>LDLR</i> | c.1187-2A>G        | Splice site | NA                 | 3 | PVS1/PM2/PM4/PP5<br>Pathogenic       |

## Supplementary Material

|             |                           |             |                   |   |                                      |
|-------------|---------------------------|-------------|-------------------|---|--------------------------------------|
| <i>LDLR</i> | c.1207T>C                 | Missense    | p.Phe403Leu       | 2 | PM1/PM2/PP3/PP5<br>Likely pathogenic |
| <i>LDLR</i> | c.1252G>A                 | Missense    | p.Glu418Lys       | 6 | PM1/PM2/PP3/PP4<br>Likely pathogenic |
| <i>LDLR</i> | c.1285G>A                 | Missense    | p.Val429Leu       | 3 | PM1/PM2/PP3/PP4<br>Likely pathogenic |
| <i>LDLR</i> | c.1297G>C                 | Missense    | p.Asp433His       | 3 | PM1/PM2/PP3/PP5<br>Likely pathogenic |
| <i>LDLR</i> | c.1328G>C                 | Missense    | p.Trp443Ser       | 4 | PM1/PM2/PP3/PP4<br>Likely pathogenic |
| <i>LDLR</i> | c.1339T>C                 | Missense    | p.Ser447Pro       | 4 | PM1/PM2/PP3/PP5<br>Likely pathogenic |
| <i>LDLR</i> | c.1340C>G                 | Missense    | p.Ser447Cys       | 2 | PM1/PM2/PP3/PP5<br>Likely pathogenic |
| <i>LDLR</i> | c.1432G>A                 | Missense    | p.Gly478Arg       | 2 | PM1/PM2/PP3/PP4<br>Likely pathogenic |
| <i>LDLR</i> | c.1466A>G                 | Missense    | p.Tyr489Cys       | 2 | PM1/PM2/PP3/PP5<br>Likely pathogenic |
| <i>LDLR</i> | c.1469G>A                 | Nonsense    | p.Trp490Ter       | 1 | PVS1/PM2/PM4/PP4<br>Pathogenic       |
| <i>LDLR</i> | c.1474G>A                 | Missense    | p.Asp492Asn       | 4 | PM1/PM2/PP3/PP4<br>Likely pathogenic |
| <i>LDLR</i> | c.1567G>A                 | Missense    | p.Val523Met       | 3 | PM1/PM2/PP3/PP5<br>Likely pathogenic |
| <i>LDLR</i> | c.1573G>T                 | Missense    | p.Asp525Tyr       | 2 | PM1/PM2/PP3/PP4<br>Likely pathogenic |
| <i>LDLR</i> | c.1586+1G>A               | Splice site | NA                | 2 | PVS1/PM2/PM4/PP4<br>Pathogenic       |
| <i>LDLR</i> | c.1652_1662delACATCTACTCG | Frameshift  | p.Asp551AlafsTer4 | 4 | PVS1/PM2/PM4/PP4<br>Pathogenic       |
| <i>LDLR</i> | c.1702C>G                 | Missense    | p.Leu568Val       | 4 | PM1/PM2/PP3/PP5<br>Likely pathogenic |
| <i>LDLR</i> | c.1705+1G>C               | Splice site | NA                | 4 | PVS1/PM2/PM4/PP4<br>Pathogenic       |

|             |                          |             |                     |    |                                          |
|-------------|--------------------------|-------------|---------------------|----|------------------------------------------|
| <i>LDLR</i> | c.1706A>G                | Missense    | p.Asp569Gly         | 2  | PM1/PM2/PP3/PP4<br>Likely pathogenic     |
| <i>LDLR</i> | c.1727A>G                | Missense    | p.Tyr576Cys         | 6  | PM1/PM2/PP3/PP4<br>Likely pathogenic     |
| <i>LDLR</i> | c.1731G>T                | Missense    | p.Trp577Cys         | 6  | PM1/PM2/PP3/PP4<br>Likely pathogenic     |
| <i>LDLR</i> | c.1778dupG               | Frameshift  | p.Asn594GlnfsTer9   | 5  | PVS1/PM2/PM4/PP4<br>Pathogenic           |
| <i>LDLR</i> | c.1783C>T                | Missense    | p.Arg595Trp         | 4  | PM1/PM2/PP3/PP4<br>Likely pathogenic     |
| <i>LDLR</i> | c.1845+2T>C              | Splice site | NA                  | 43 | PVS1/PM2/PM4/PP4<br>Pathogenic           |
| <i>LDLR</i> | c.1859G>C                | Missense    | p.Trp620Ser         | 2  | PM1/PM2/PP3/PP4<br>Likely pathogenic     |
| <i>LDLR</i> | c.1868T>A                | Missense    | p.Ile623Asn         | 3  | PM1/PM2/PP3/PP4<br>Likely pathogenic     |
| <i>LDLR</i> | c.1897C>T                | Missense    | p.Arg633Cys         | 2  | PM1/PM2/PP3/PP4<br>Likely pathogenic     |
| <i>LDLR</i> | c.1925T>C                | Missense    | p.Leu642Ser         | 3  | PM1/PM2/PP3/PP4/PP5<br>Likely pathogenic |
| <i>LDLR</i> | c.1998G>C                | Missense    | p.Trp666Cys         | 2  | PM1/PM2/PP3/PP4<br>Likely pathogenic     |
| <i>LDLR</i> | c.2050G>T                | Missense    | p.Ala684Ser         | 2  | PM1/PM2/PP3/PP4<br>Likely pathogenic     |
| <i>LDLR</i> | c.2054C>T                | Missense    | p.Pro685Leu         | 34 | PM1/PM2/PP3/PP4/PP5<br>Likely pathogenic |
| <i>LDLR</i> | c.2096C>T                | Missense    | p.Pro699Leu         | 4  | PM1/PM2/PP3/PP4<br>Likely pathogenic     |
| <i>LDLR</i> | c.2389G>A                | Missense    | p.Val797Met         | 13 | PM1/PM2/PP3/PP4<br>Likely pathogenic     |
| <i>LDLR</i> | c.2390-4_2393delACAGTGCT | Splice site | NA                  | 3  | PVS1/PM2/PM4/PP4<br>Pathogenic           |
| <i>LDLR</i> | c.2416delG               | Frameshift  | p.Val806SerfsTer123 | 4  | PVS1/PM2/PM4/PP4<br>Pathogenic           |

Supplementary Material

|              |                    |                   |                    |     |                                   |
|--------------|--------------------|-------------------|--------------------|-----|-----------------------------------|
| <i>LDLR</i>  | c.2416dupG         | Frameshift        | p.Val806GlyfsTer11 | 4   | PVS1/PM2/PM4/PP4<br>Pathogenic    |
| <i>LDLR</i>  | c.2431A>T          | Nonsense          | p.Lys811Ter        | 185 | PVS1/PM2/PM4/PP4<br>Pathogenic    |
| <i>LDLR</i>  | c.2500G>A          | Missense          | p.Asp834Asn        | 4   | PVS1/PM2/PM4/PP4<br>Pathogenic    |
| <i>LDLR</i>  | c.2579C>T          | Missense          | p.Ala860Val        | 4   | PVS1/PM2/PM4/PP4<br>Pathogenic    |
| <i>LDLR</i>  | c.313-?_2311+?del  | Large deletion    | Truncated protein  | 21  | PVS1/PM2/PM4/PP4<br>Pathogenic    |
| <i>LDLR</i>  | c.1186-?_1587+?dup | Large duplication | Truncated protein  | 17  | PVS1/PM2/PM4/PP4<br>Pathogenic    |
| <i>LDLR</i>  | c.1845-?_2141+?del | Large deletion    | Truncated protein  | 16  | PVS1/PM2/PM4/PP4<br>Pathogenic    |
| <i>LDLR</i>  | c.2141-?_2311+?del | Large deletion    | Truncated protein  | 15  | PVS1/PM2/PM4/PP4<br>Pathogenic    |
| <i>PCSK9</i> | c.94G>A            | Missense          | p.Glu32Lys         | 42  | PS1/PS3/PP3/PP4/PP5<br>Pathogenic |

---

ACMG: American College of Medical Genetics, *LDLR*: low-density lipoprotein receptor, *PCSK9*: proprotein convertase subtilisin/kexin type 9, NA: not applicable, FH: familial hypercholesterolemia



**Supplemental Table 2. Characteristics of the study subjects included and excluded**

| Variable                                   | Study population<br>(n = 1,050) | Individuals excluded*<br>(n = 955) | p value |
|--------------------------------------------|---------------------------------|------------------------------------|---------|
| Age (years)                                | 49 ± 16                         | 44 ± 19                            | 0.0034  |
| Male gender (%)                            | 490 (46.7%)                     | 448 (46.9%)                        | 0.95    |
| LDL cholesterol level (at baseline, mg/dL) | 244 [208–279]                   | 240 [200–268]                      | 0.14    |

\*homozygous and compound heterozygous FH were excluded.
